# Supplementary material for: Graphitized mesoporous carbon modified glassy carbon electrode for selective sensing of xanthine, hypoxanthine and uric acid
Source: Royal Society of Chemistry journal article supplement (doi:10.1039/c2ay25029b), 2012-01-01
Supplement: c2ay25029b.pdf [file c2ay25029b.pdf]

## Graphitized mesoporous carbon modified glassy carbon electrode for selective sensing of xanthine, hypoxanthine and uric acid

Rajendiran Thangaraj, Annamalai Senthil Kumar\*

*Environmental and Analytical Chemistry Division, School of Advanced Sciences,*

*Vellore Institute of Technology University, Vellore-632 014, India*

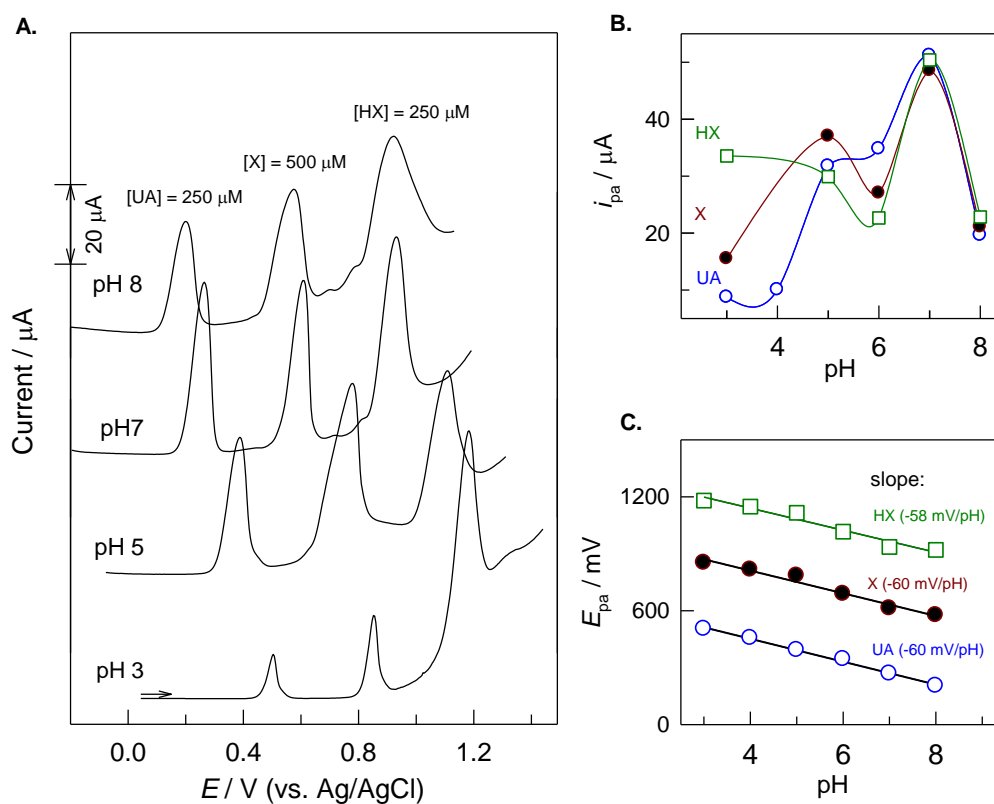

Figure S1 (A) Effect of solution pH on the simultaneous DPV responses of UA, X and HX mixture. Other DPV parameters are as in the Figure 4. Plots of  $i_{pa}$  vs pH (B) and  $E_{pa}$  vs pH (C) for the electrochemical purine oxidation reactions.
